# Supplementary material for: Facile synthesis of a highly SERS active nanosilver sol using microwaves and its application in the detection of E. coli using Victoria blue B as a molecular probe
Source: Royal Society of Chemistry journal article supplement (doi:10.1039/c6ay00728g), 2016-01-01
Supplement: c6ay00728g1.pdf [file c6ay00728g1.pdf]

Facile synthesis of highly SERS active nanosilver sol with microwave and its application to detect *E. coli* using Victoria blue B as molecular probe

Yaohui Wang, Xinghui Zhang, Guiqing Wen, Aihui Liang\* and Zhiliang Jiang\*

Key Laboratory of Ecology of Rare and Endangered Species and Environmental Protection of Ministry Education, Guangxi Normal University, Guilin 541004, China

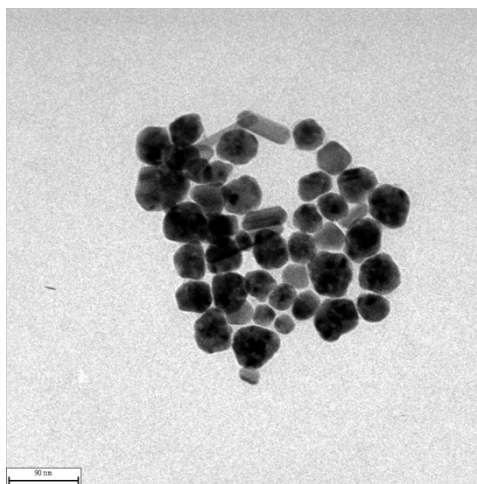

Fig. S1 TEM of the AgNPs using diethanolamine as a reductant

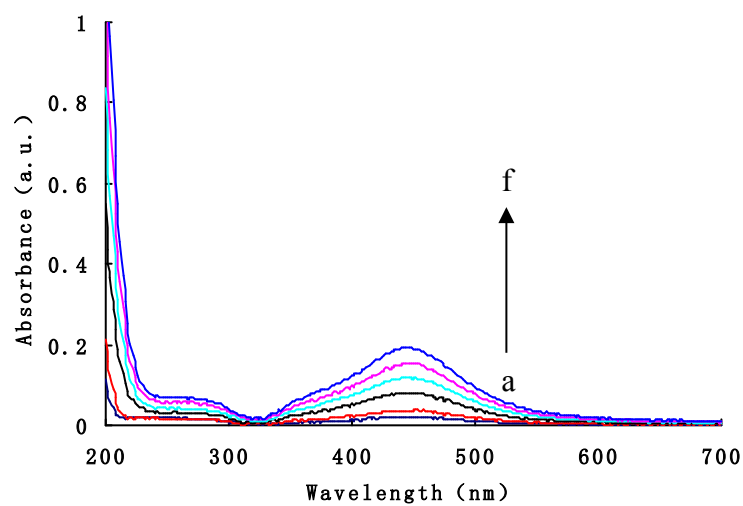

Fig. S2 SPR absorption spectra of the AgNRs

(a) 0.5 µg/ml AgNPs; (b) 1 µg/ml AgNPs; (c) 2 µg/ml AgNPs; (d) 3 µg/ml AgNPs; (e) 4 µg/ml AgNPs; (f) 5 µg/ml AgNPs

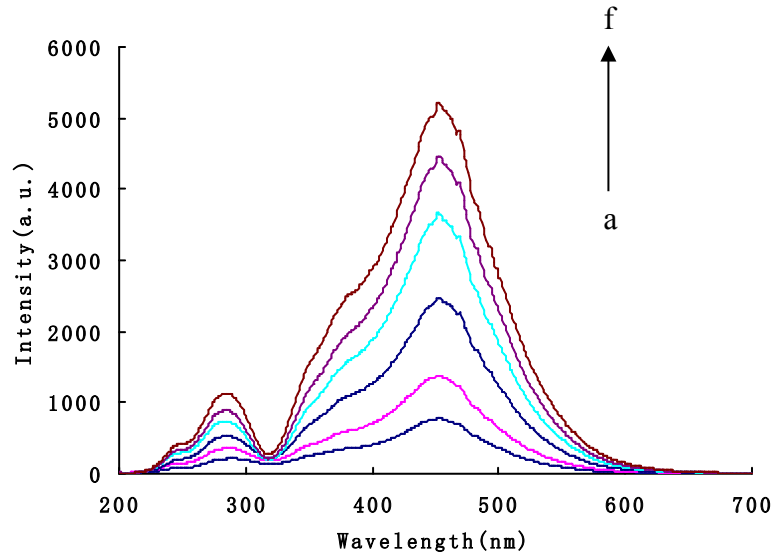

**Fig. S3** RRS spectra of AgNRs

(a) 0.5 µg/ml AgNPs; (b) 1 µg/ml AgNPs; (c) 2 µg/ml AgNPs; (d) 3 µg/ml AgNPs; (e) 4 µg/ml AgNPs; (f) 5 µg/ml AgNPs

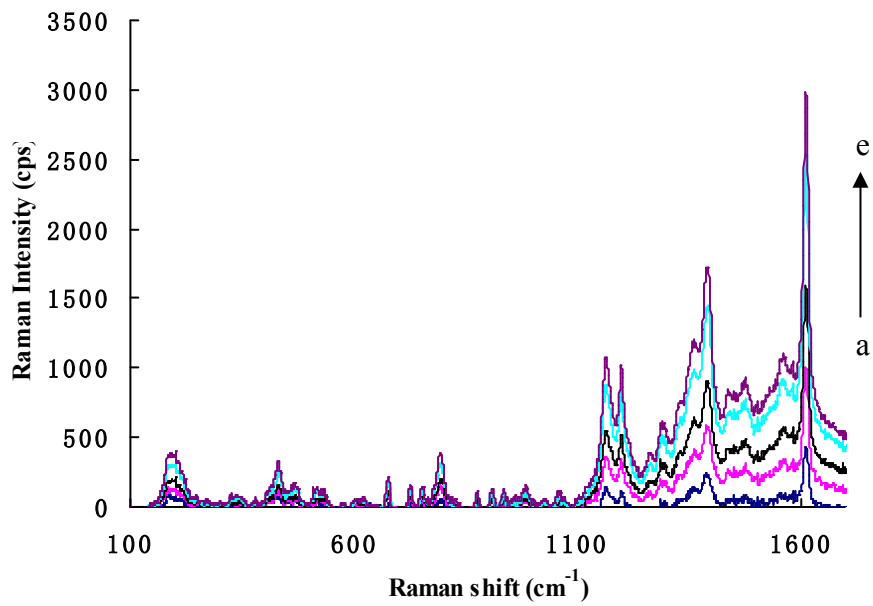

**Fig S4** SERS spectra of AgNPs

(a) 2 µg/mL AgNPs+0.25 µmol/L VBB +pH 6.8 PBS+1.5 mmol/L NaCl; (b) 3 µg/mL AgNPs+0.25 µmol/L VBB +0.25 mol/L NaCl; (c) 4 µg/mL AgNPs+0.25 µmol/L VBB +0.25 mol/L NaCl; (d) 5 µg/mL AgNPs+0.25 µmol/L VBB +0.25 mol/L NaCl; (e) 6 µg/mL AgNPs+0.25 µmol/L VBB +0.25 mol/L NaCl.

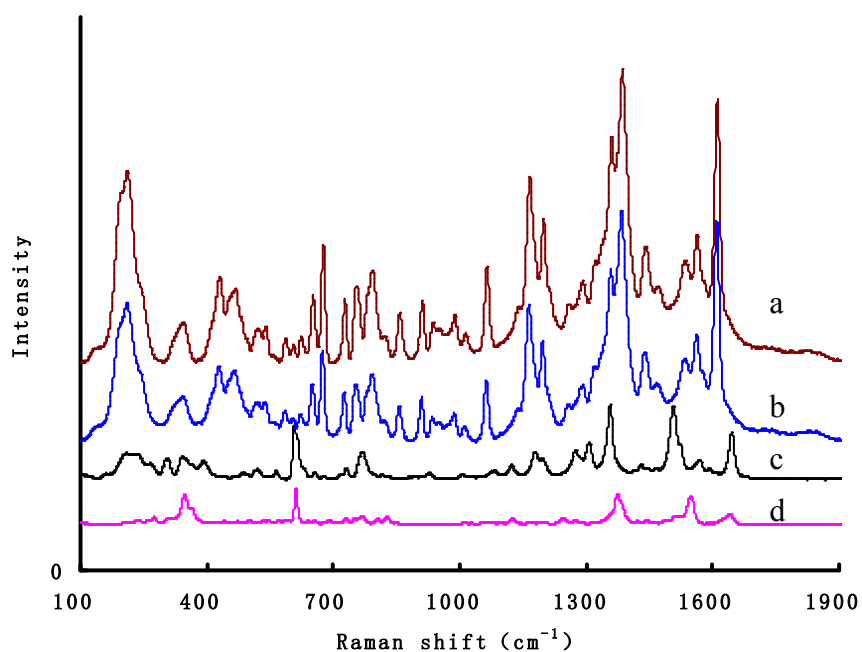

**Fig. S5** SERS spectra of VBB, VB4R, AR and ST stained *E. coli*. a: 5  $\mu\text{g/mL}$  AgNPs- $1.5 \times 10^{-3}$  mol/L NaCl-0.01  $\mu\text{g/mL}$   $\text{AgNO}_3$ -pH 6.8 PBS- $5.0 \times 10^8$  cfu/ml VBB-*E. coli*; b: 5  $\mu\text{g/mL}$  AgNPs- $1.5 \times 10^{-3}$  mol/L NaCl-pH 6.8 PBS- $5.0 \times 10^8$  cfu/mL VB4R-*E. coli*; c: 5  $\mu\text{g/mL}$  AgNPs- $1.5 \times 10^{-3}$  mol/L NaCl-pH 6.8 PBS- $5.0 \times 10^8$  cfu/mL AR-*E. coli*; d: 5  $\mu\text{g/mL}$  AgNPs- $1.5 \times 10^{-3}$  mol/L NaCl-pH 6.8 PBS- $5.0 \times 10^8$  cfu/mL ST-*E. coli*.

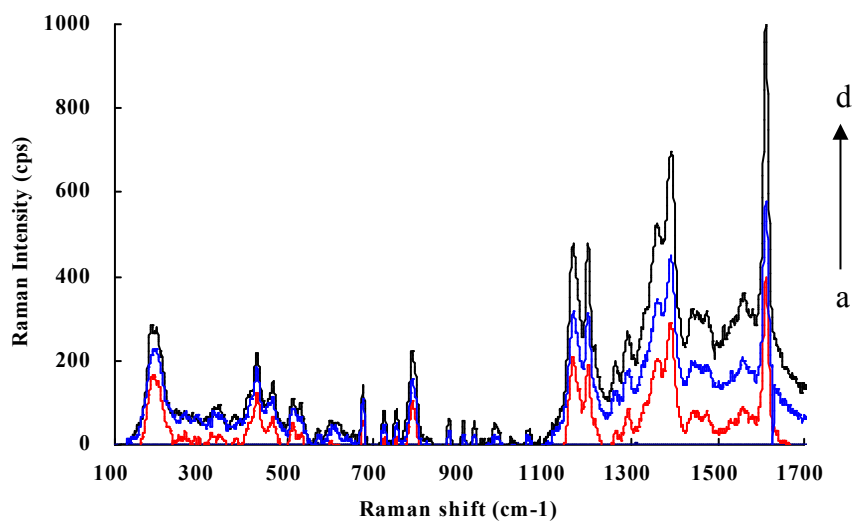

**Fig S6** SERS spectra of VBB-*B. subtilis*

a: 5  $\mu\text{g/mL}$  AgNPs-2  $\mu\text{mol/L}$   $\text{AgNO}_3$ - $1.5 \times 10^{-3}$  mol/L NaCl-0.01  $\mu\text{g/mL}$   $\text{AgNO}_3$ -pH 6.8 PBS; b: a- $1.25 \times 10^8$ /mL *B. subtilis*; c: a- $2.5 \times 10^8$ /mL *B. subtilis*; d: a- $3.75 \times 10^8$ /mL *B. subtilis*.

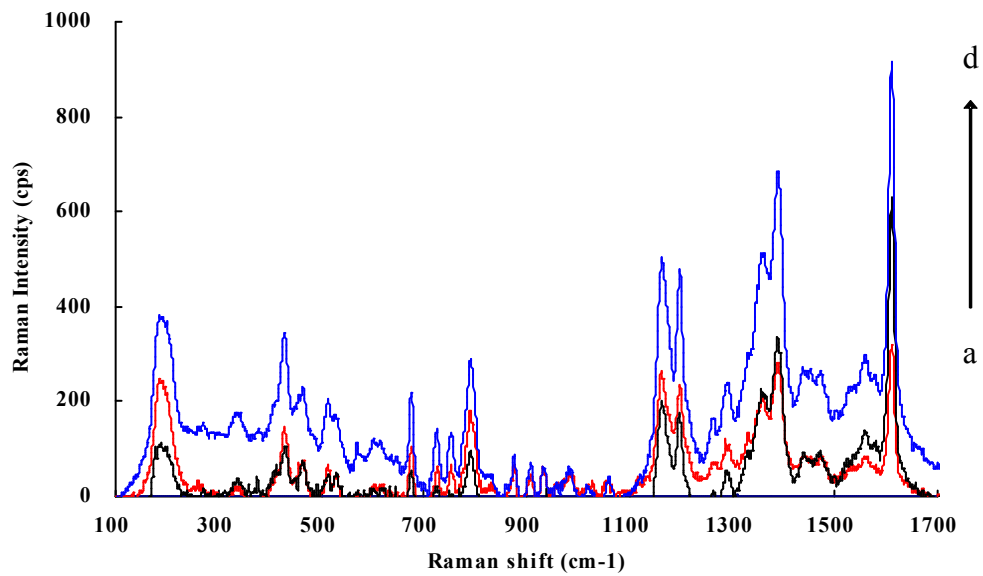

**Fig. S7** SERS spectra of VBB-*S. aureus*

a: 5  $\mu\text{g/mL}$  AgNPs -2  $\mu\text{mol/L}$  AgNO<sub>3</sub>-1.5 $\times 10^{-3}$  mol/L NaCl-0.01  $\mu\text{g/mL}$  AgNO<sub>3</sub>-pH 6.8 PBS; b: a-4.8 $\times 10^4$ /mL *S. aureus*; c: a-9.6 $\times 10^4$ /mL *S. aureus*; d: a-14.4 $\times 10^4$ /mL *S. aureus*.

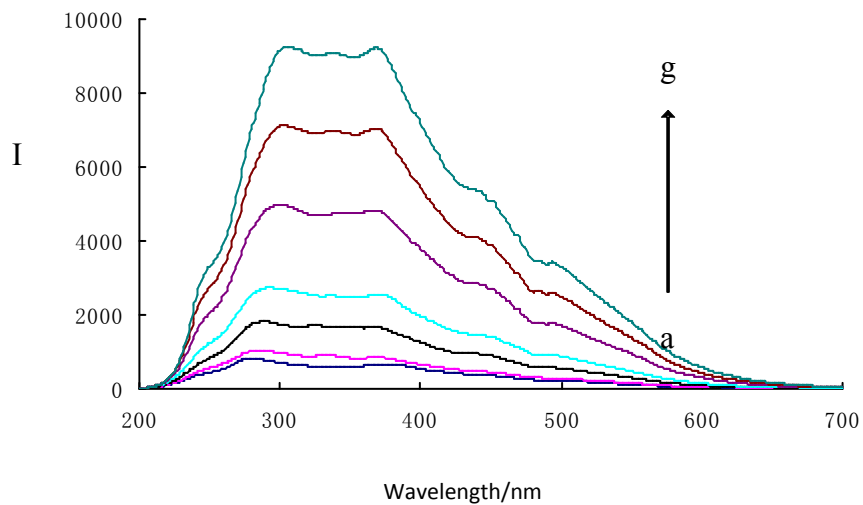

**Fig. S8** RRS spectra of *B. subtilis*

a: 1 $\times 10^8$ /mL *B. subtilis*; b: 2 $\times 10^8$ /mL *B. subtilis*; c: 4 $\times 10^8$ /mL *B. subtilis*; d: 8 $\times 10^8$ /mL *B. subtilis*; e: 16 $\times 10^8$ /mL *B. subtilis*; f: 24 $\times 10^8$ /mL *B. subtilis*; g: 32 $\times 10^8$ /mL *B. subtilis*.

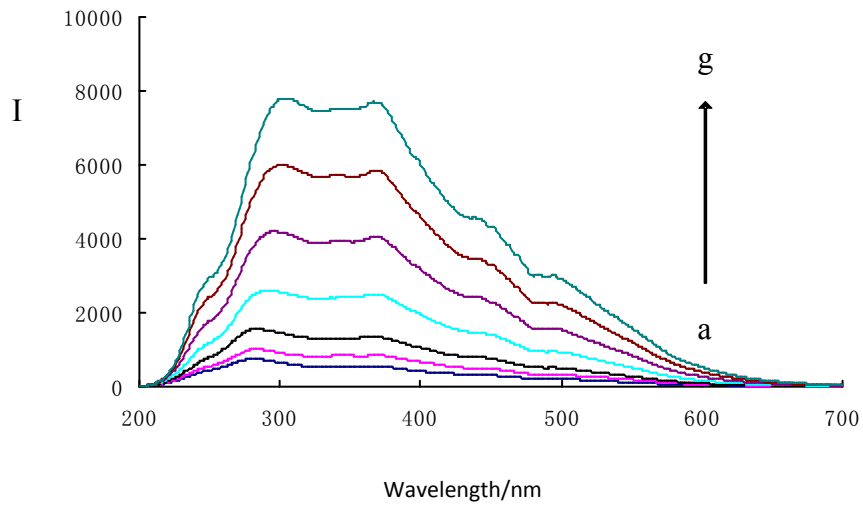

**Fig. S9** RRS spectra of *S. aureus*

a:  $0.65 \times 10^5$ /mL *S. aureus*; b:  $1.3 \times 10^5$ /mL *S. aureus*; c:  $2.6 \times 10^5$ /mL *S. aureus*; d:  $5.2 \times 10^5$ /mL *S. aureus*; e:  $10.4 \times 10^5$ /mL *S. aureus*; f:  $15.6 \times 10^5$ /mL *S. aureus*; g:  $20.8 \times 10^5$ /mL *S. aureus*.

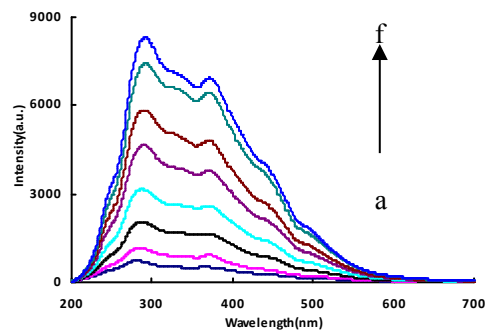

**Fig. S10** RRS spectra of VBB- *E. coli*. a:  $1.5 \times 10^8$  cfu/mL VBB-*E. coli*; b:  $3.0 \times 10^8$  cfu/mL VBB-*E. coli*; c:  $6.0 \times 10^8$  cfu/mL VBB-*E. coli*; d:  $12 \times 10^8$  cfu/mL VBB-*E. coli*; e:  $24 \times 10^8$  cfu/mL VBB-*E. coli*; f:  $36 \times 10^8$  cfu/mL VBB-*E. coli*.

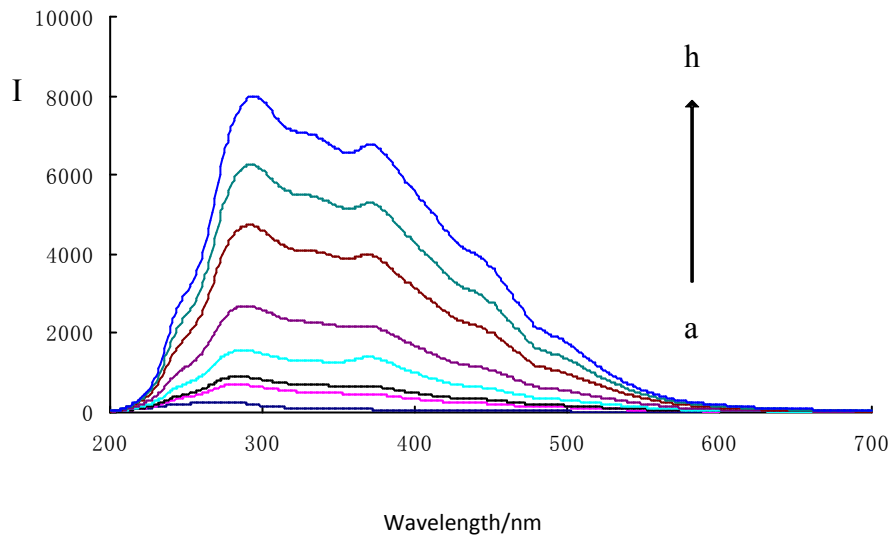

**Fig. S11** RRS spectra of VBB- *B. subtilis*

a: water; b:  $1.25 \times 10^8$ /mL VBB-*B. subtilis*; c:  $2.5 \times 10^8$ /mL VBB-*B. subtilis*; d:  $5 \times 10^8$ /mL VBB-*B. subtilis*; e:  $10 \times 10^8$ /mL VBB-*B. subtilis*; f:  $20 \times 10^8$ /mL VBB-*B. subtilis*; g:  $30 \times 10^8$ /mL VBB-*B. subtilis*; h:  $40 \times 10^8$ /mL VBB-*B. subtilis*.

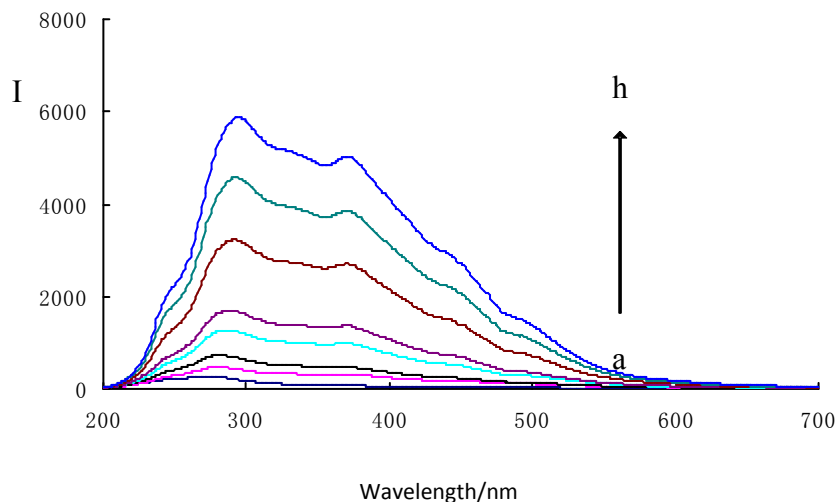

**Fig. S12** RRS spectra of VBB- *S. aureus*

a: water; b:  $0.32 \times 10^5$ /mL VBB-*S. aureus*; c:  $0.65 \times 10^5$ /mL VBB-*S. aureus*; d:  $1.3 \times 10^5$ /mL VBB-*S. aureus*; e:  $2.6 \times 10^5$ /mL VBB-*S. aureus*; f:  $5.2 \times 10^5$ /mL VBB-*S. aureus*; g:  $7.8 \times 10^5$ /mL VBB-*S. aureus*; h:  $10.4 \times 10^5$ /mL VBB-*S. aureus*.

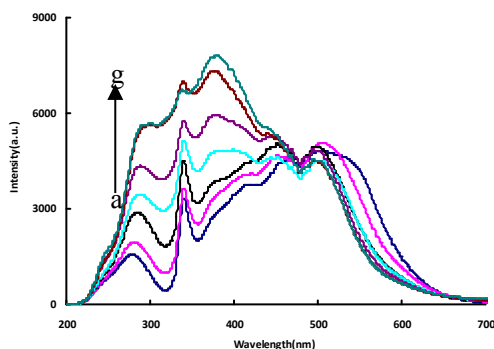

**Fig.S13** RRS spectra of AgNPs-NaCl-VBB-*E. coli*. a: 5  $\mu$ g/mL AgNRs- $1.5 \times 10^{-3}$  mol/L NaCl-0.01  $\mu$ g/mL AgNO<sub>3</sub>-pH 6.8 PBS; b: a+ $1.0 \times 10^8$  cfu/mL VBB-*E. coli*; c: a+ $2.0 \times 10^8$  cfu/mL VBB-*E. coli*; d: a+ $4.0 \times 10^8$  cfu/mL VBB-*E. coli*; e: a+ $8.0 \times 10^8$  cfu/mL VBB-*E. coli*; f: a+ $12 \times 10^8$  cfu/mL VBB-*E. coli*; g: a+ $16 \times 10^8$  cfu/mL VBB-*E. coli*.

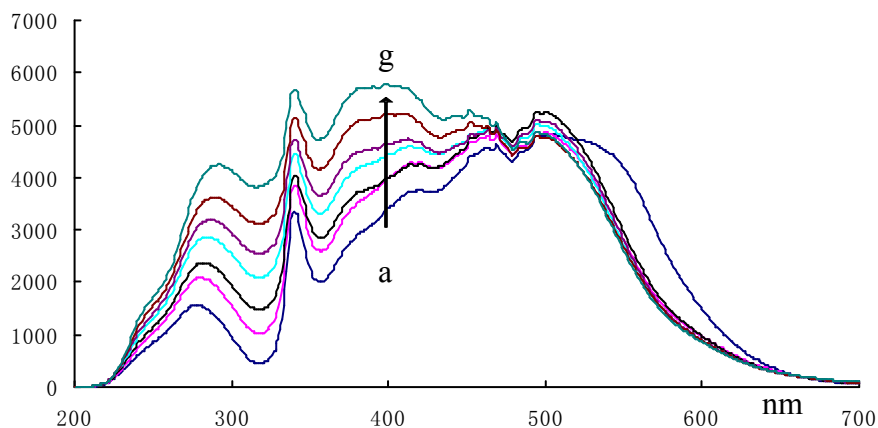

Wavelength/nm

**Fig. S14** RRS spectra of AgNPs-NaCl-AgNO<sub>3</sub>-VBB- *S. aureus*

a: 5  $\mu\text{g/mL}$  AgNPs  $-1.5 \times 10^{-3}$  mol/L NaCl-0.01  $\mu\text{g/mL}$  AgNO<sub>3</sub>-pH 6.8 PBS; b: a-  $1.6 \times 10^5$ /mL VBB-*S. aureus*; c: a-  $3.2 \times 10^5$ /mL VBB-*S. aureus*; d: a-  $4.8 \times 10^5$ /mL VBB-*S. aureus*; e: a-  $6.4 \times 10^5$ /mL VBB-*S. aureus*; f: a-  $8.0 \times 10^5$ /mL VBB-*S. aureus*; g: a-  $9.6 \times 10^5$ /mL VBB-*S. aureus*.

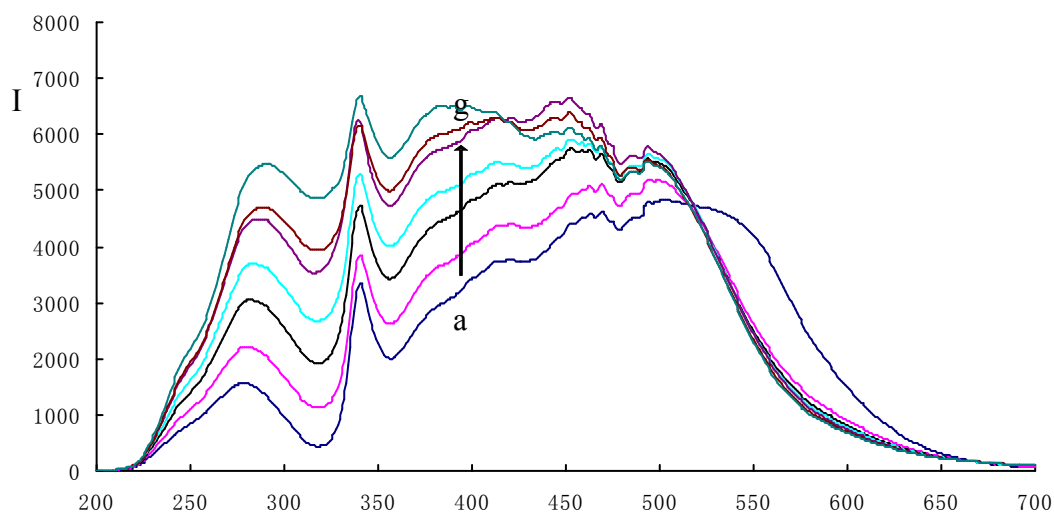

Wavelength/nm

**Fig. S15** RRS spectra of AgNPs-NaCl-VBB- *B. subtilis*

a: 5  $\mu\text{g/mL}$  AgNPs  $-1.5 \times 10^{-3}$  mol/L NaCl-0.01  $\mu\text{g/mL}$  AgNO<sub>3</sub>-pH 6.8 PBS; b: a-  $1.25 \times 10^8$ /mL *B. subtilis*; c: a-  $2.5 \times 10^8$ /mL *B. subtilis*; d: a-  $3.75 \times 10^8$ /mL *B. subtilis*; e: a-  $5.0 \times 10^8$ /mL *B. subtilis*; f: a-  $6.25 \times 10^8$ /mL *B. subtilis*; g: a-  $7.5 \times 10^8$ /mL *B. subtilis*.

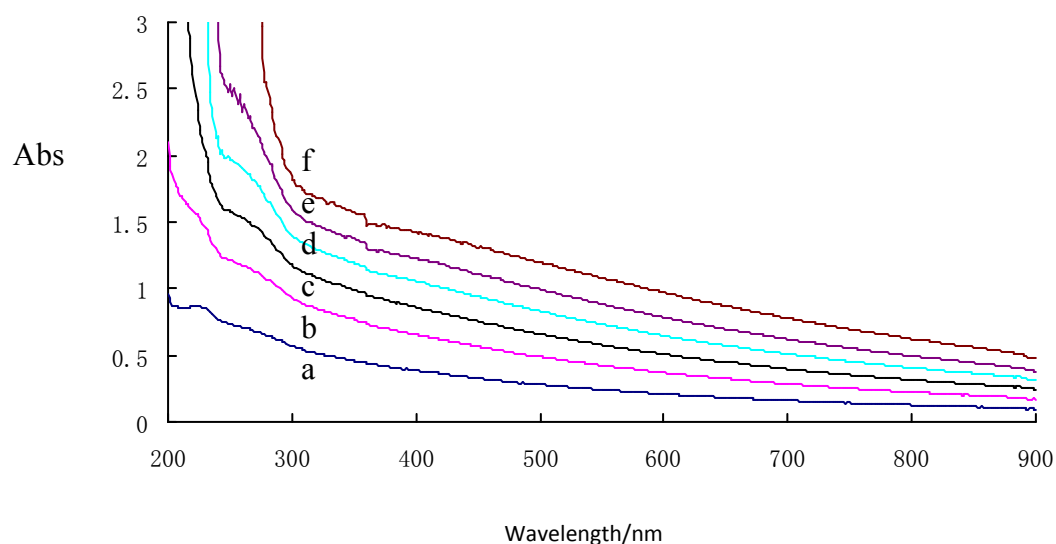

**Fig. S16** Absorption spectra *E. coli*

a:  $1.5 \times 10^9$ /mL *E. coli*; b:  $3.0 \times 10^9$ /mL *E. coli*; c:  $4.5 \times 10^9$ /mL *E. coli*; d:  $6.0 \times 10^9$ /mL *E. coli*; e:  $7.5 \times 10^9$ /mL *E. coli*; f:  $9.0 \times 10^9$ /mL *E. coli*.

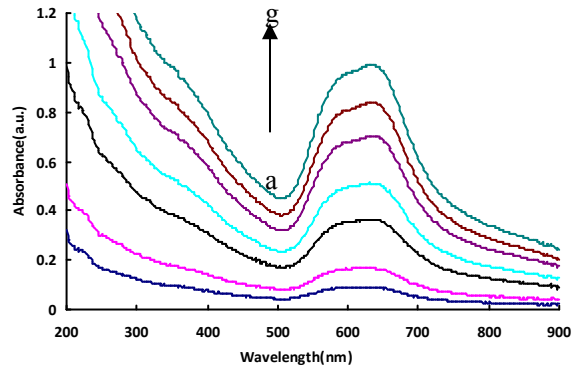

**Fig. S17** Absorption spectra of VBB- *E. coli*. a:  $0.6 \times 10^9$  cfu/mL VBB-*E. coli*; b:  $1.2 \times 10^9$  cfu/mL VBB-*E. coli*; c:  $2.4 \times 10^9$  cfu/mL VBB-*E. coli*; d:  $3.6 \times 10^9$  cfu/mL VBB-*E. coli*; e:  $4.8 \times 10^9$  cfu/mL VBB-*E. coli*; f:  $6.0 \times 10^9$  cfu/mL VBB-*E. coli*; g:  $7.2 \times 10^9$  cfu/mL VBB-*E. coli*.

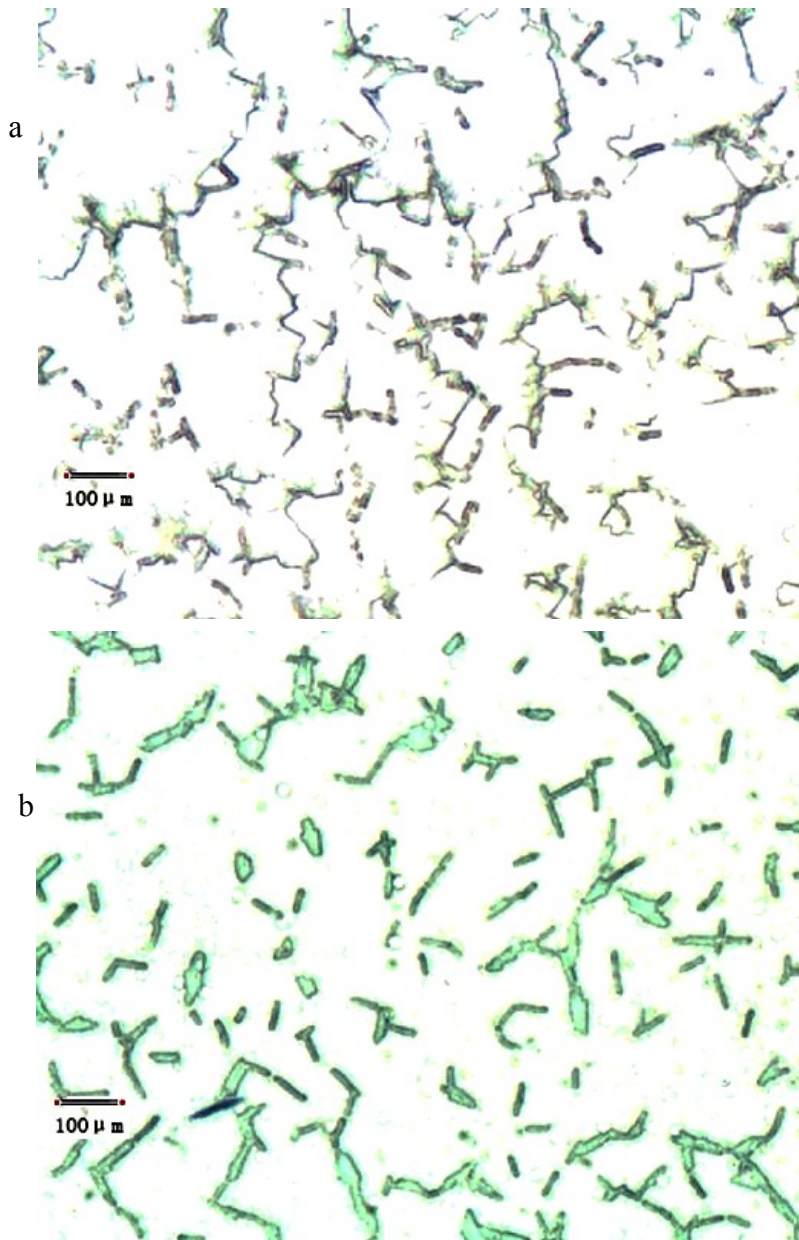

**Fig. S18** Optical micrographs of *E. coli*



a: *E. coli*; b: VBB-*E. coli*

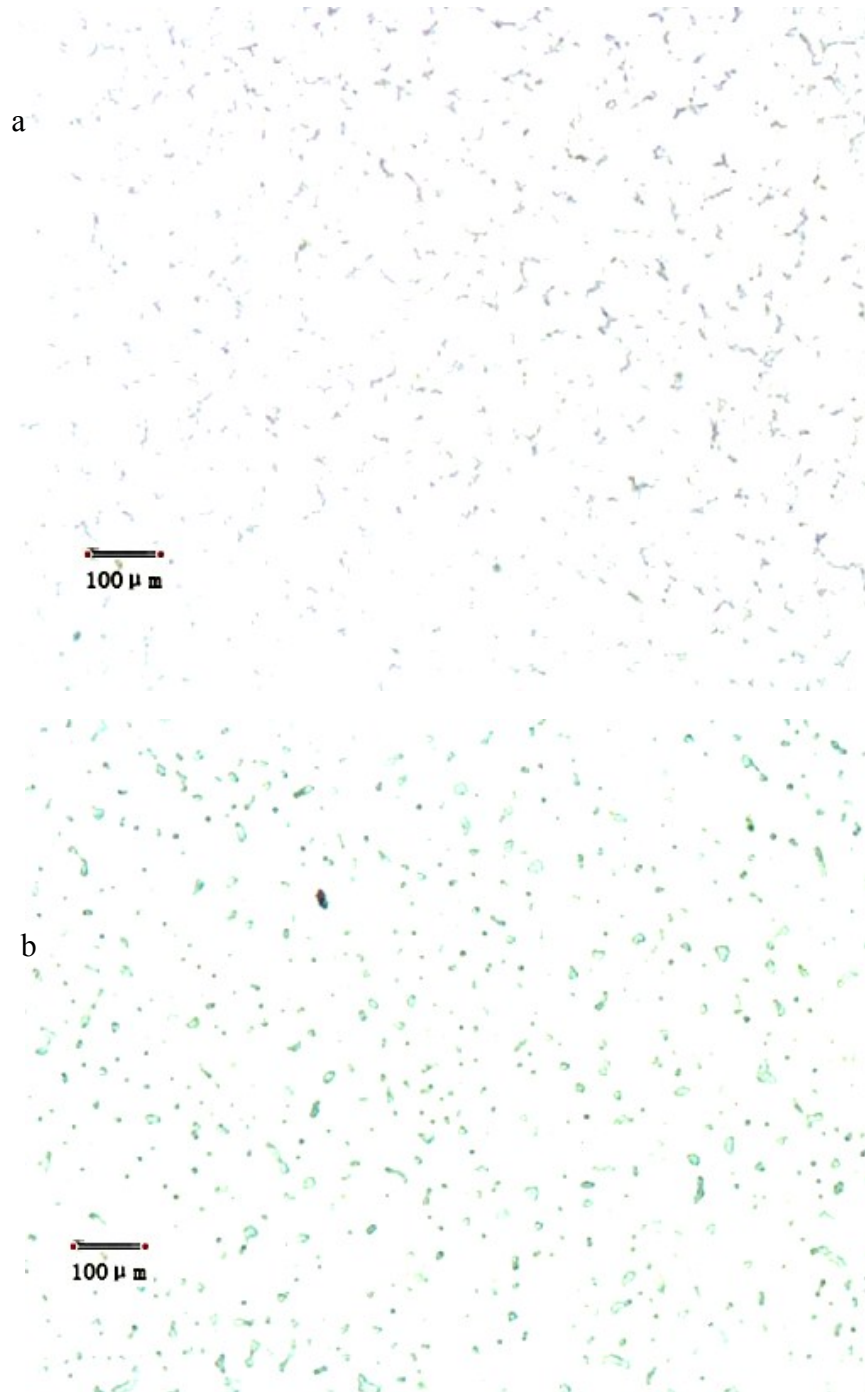

**Fig. S19** Optical micrographs of aureus

a: *S. aureus*; b: VBB-*S. aureus*

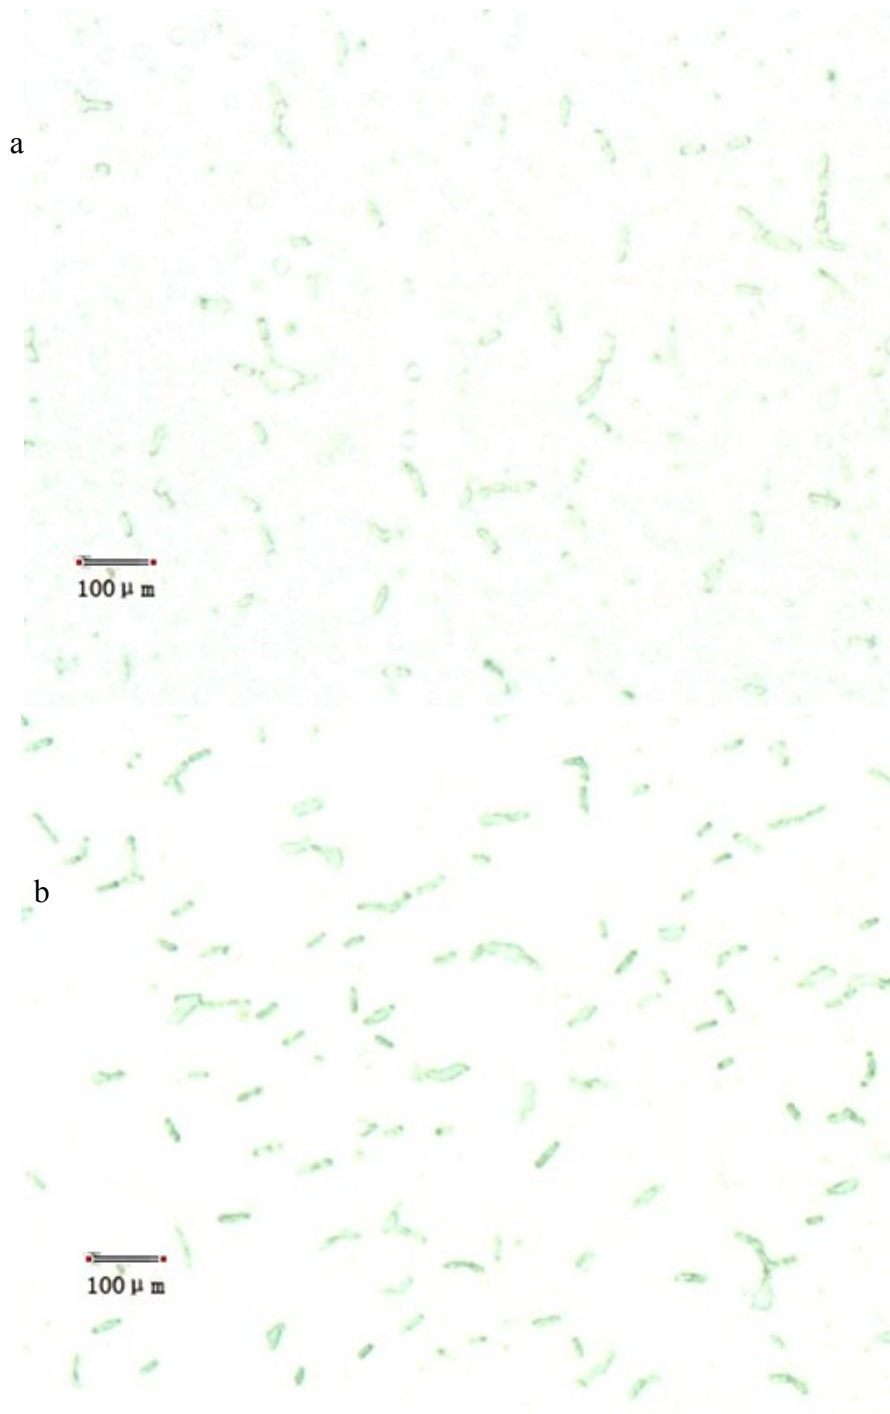

**Fig. S20** Optical micrographs of subtilis

a: *B. subtilis*; b: VBB-*B. subtilis*

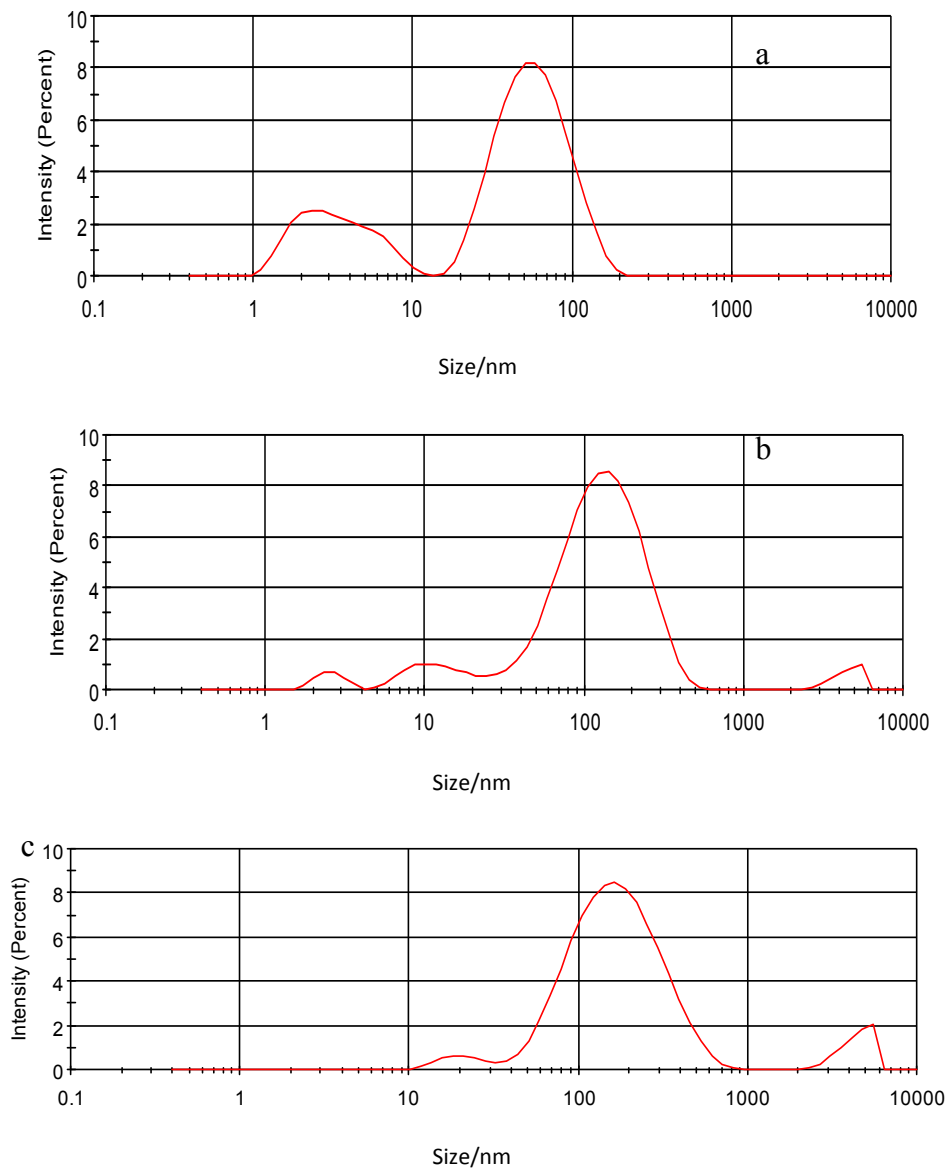

**Fig. S21** Laser scattering diagram of AgNPs-NaCl-AgNO<sub>3</sub>-VBB-*E. coli*

a: 5 μg/mL AgNPs-1.5×10<sup>-3</sup> mol/L NaCl -1 μmol/mL AgNO<sub>3</sub>-pH 6.8 PBS; b:a- 7.5×10<sup>8</sup>/mL VBB-*E. coli*; c:a-3×10<sup>9</sup>/mL VBB-*E. coli*.

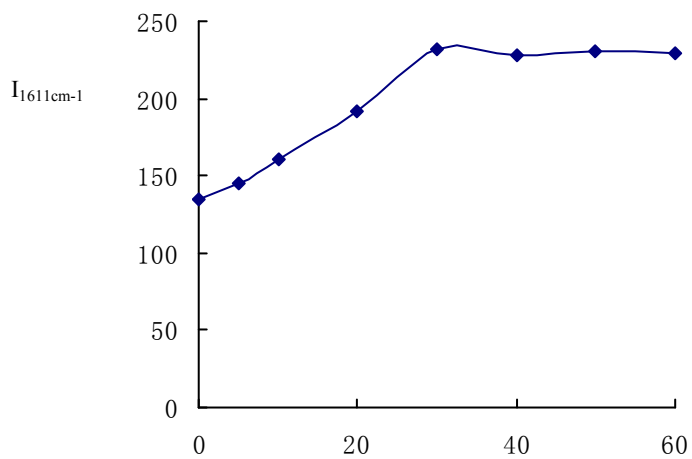

time/min

**Fig. S22** Effect of staining time in staining process (*E. coli*)

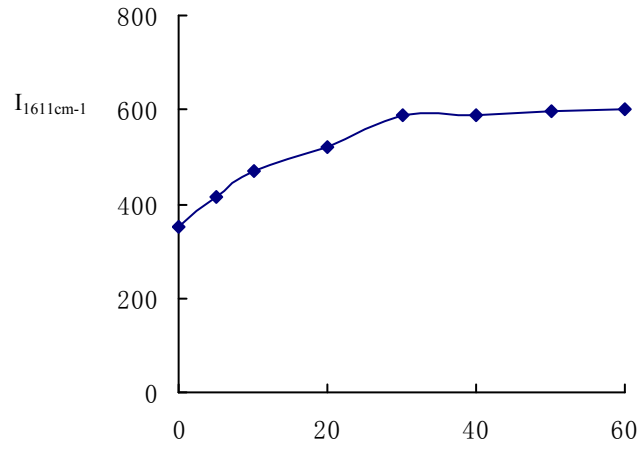

time/min

**Fig. S23** Effect of staining time in staining process (*S. aureus*)

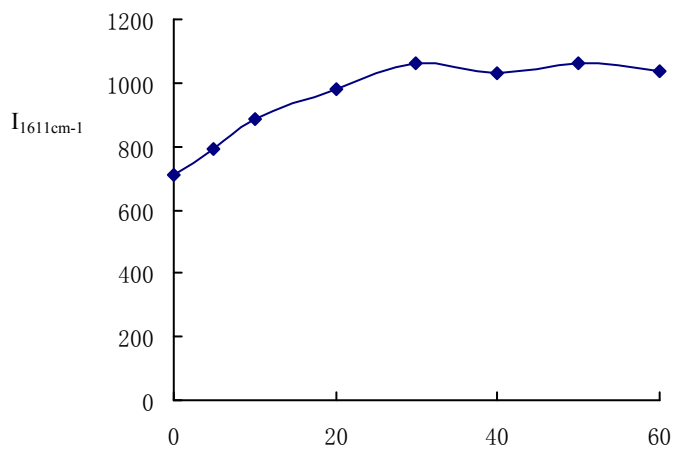

time/min

**Fig. S24** Effect of staining time in staining process (*B. subtilis*)

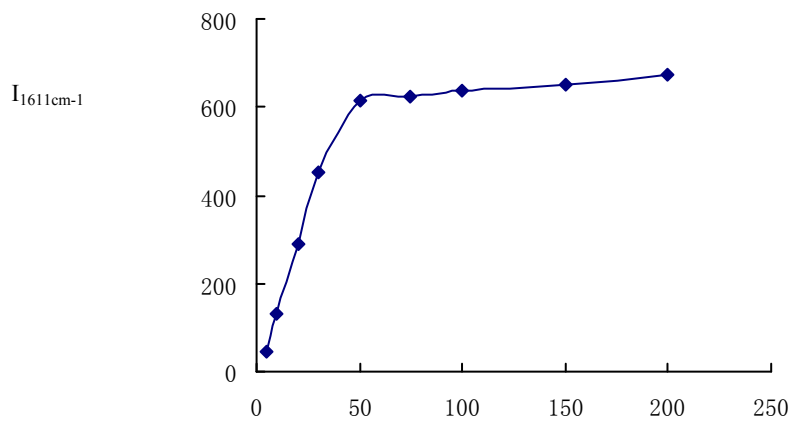

$\mu\text{mol/L}$

**Fig. S25** Effect of VBB concentration in staining process

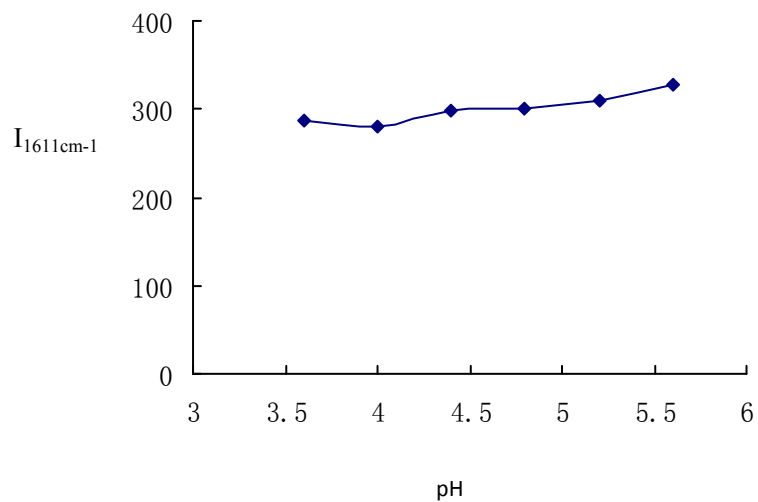

**Fig. S26** Effect of pH NaAc-HAc buffer solution in staining process

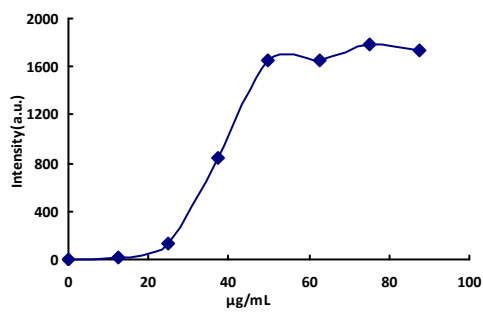

**Fig.S27** Effect of AgNPs concentration in detecting process

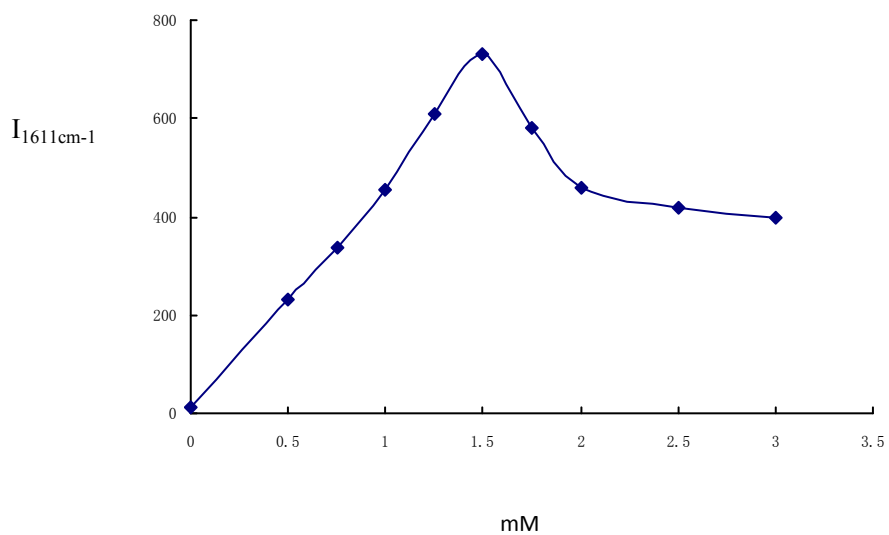

**Fig. S28** Effect of NaCl concentration in detecting process

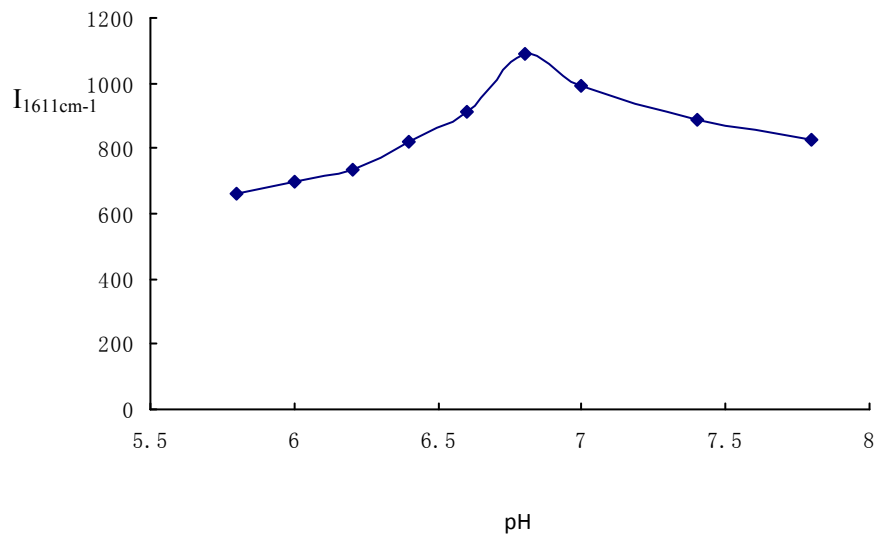

**Fig. S29** Effect of pH PBS buffer solution in detecting process

**Table S1** Stability of AgNRs

| Days \ Intensity          | 1     | 2     | 3     | 5     | 7     | 10    | 13    | 18    | 23    | 28    | 33    | 38    |
|---------------------------|-------|-------|-------|-------|-------|-------|-------|-------|-------|-------|-------|-------|
| $A_{444\text{ nm}}$       | 0.192 | 0.189 | 0.197 | 0.184 | 0.185 | 0.200 | 0.195 | 0.187 | 0.199 | 0.210 | 0.229 | 0.236 |
| $I_{1611\text{ cm}^{-1}}$ | 2520  | 2666  | 2519  | 2681  | 2395  | 2473  | 2510  | 2600  | 2629  | 2467  | 2903  | 1936  |

Table S2 Assignment of SERS peaks different for molecular probes in AgNPs sol

| Molecular probes | Peak positions/<br>intensity                     | Vibration mode                                                       | Structure                                                                            |
|------------------|--------------------------------------------------|----------------------------------------------------------------------|--------------------------------------------------------------------------------------|
| VBB              | 198 m                                            | Skeletal bending                                                     | 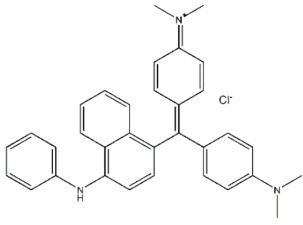   |
|                  | 432 w                                            | $\nu(\text{C}=\text{N}), \nu(\text{C}=\text{C})$                     |                                                                                      |
|                  | 677 w                                            | $\gamma(\text{CH})$                                                  |                                                                                      |
|                  | 793 m                                            | $\gamma(\text{C}-\text{C})$<br>Aromatics<br>$\nu(\text{C}-\text{C})$ |                                                                                      |
|                  | 1165 s                                           | Aromatics, $\delta(\text{CH})$                                       |                                                                                      |
|                  | 1199 s                                           | $\delta(\text{CH}), \delta(\text{CH}_3)$                             |                                                                                      |
|                  | 1364 s                                           | $\nu(\text{C}-\text{N}), \delta(\text{CH}_3)$                        |                                                                                      |
|                  | 1392 vs                                          | $\nu(\text{circle}), \nu(\text{C}-\text{N})$                         |                                                                                      |
|                  | 1445 m                                           | $\delta(\text{CH}_3)$                                                |                                                                                      |
|                  | 1478 m                                           | $\delta(\text{circle})$                                              |                                                                                      |
|                  | 1562 m                                           | $\delta(\text{CH})$                                                  |                                                                                      |
|                  | 1611 vs                                          | $\nu(\text{C}=\text{N}), \nu(\text{N}-\text{H})$                     |                                                                                      |
|                  | VB4R                                             | 214 m                                                                |                                                                                      |
| 431 w            |                                                  | $\delta(\text{CH})$                                                  |                                                                                      |
| 676 w            |                                                  | $\gamma(\text{CH})$                                                  |                                                                                      |
| 797 m            |                                                  | $\gamma(\text{C}-\text{C})$<br>Aromatics<br>$\nu(\text{C}-\text{C})$ |                                                                                      |
| 1167 s           |                                                  | Aromatics, $\delta(\text{CH})$                                       |                                                                                      |
| 1200 s           |                                                  | $\delta(\text{CH}), \delta(\text{CH}_3)$                             |                                                                                      |
| 1374 s           |                                                  | $\nu(\text{C}-\text{N}), \delta(\text{CH}_3)$                        |                                                                                      |
| 1385 vs          |                                                  | CH in<br>$\delta(\text{CH})(\text{C}=\text{C})$                      |                                                                                      |
| 1444 m           |                                                  | $\delta(\text{CH}_3)$                                                |                                                                                      |
| 1565 s           |                                                  | $\nu(\text{C}=\text{N}), \nu(\text{N}-\text{H})$                     |                                                                                      |
| 1611 vs          | $\nu(\text{C}=\text{N}), \nu(\text{C}=\text{C})$ |                                                                      |                                                                                      |
| ST               | 188 w                                            | Skeletal bending                                                     |  |
|                  | 431 s                                            | $\delta(\text{CH})$                                                  |                                                                                      |
|                  | 679 m                                            | $\gamma(\text{CH})$                                                  |                                                                                      |
|                  | 795 s                                            | $\gamma(\text{C}-\text{C})$<br>Aromatics<br>$\nu(\text{C}-\text{C})$ |                                                                                      |
|                  | 1167 s                                           | Aromatics, $\delta(\text{CH})$                                       |                                                                                      |
|                  | 1200 s                                           | $\delta(\text{CH}), \delta(\text{CH}_3)$                             |                                                                                      |
|                  | 1366 s                                           | $\nu(\text{C}-\text{N}), \delta(\text{CH}_3)$                        |                                                                                      |
|                  | 1391 vs                                          | CH in $\delta(\text{CH})(\text{C}=\text{C})$                         |                                                                                      |
| 1613 vs          | $\nu(\text{C}=\text{N}), \nu(\text{C}=\text{C})$ |                                                                      |                                                                                      |
| AR               | 205 m                                            | Skeletal bending                                                     |  |
|                  | 492 m                                            | $\gamma(\text{CH}) \sigma(\text{C}-\text{Cl})$                       |                                                                                      |
|                  | 749 m                                            | $\nu(\text{circle})$<br>$\delta(\text{CH}_2)$                        |                                                                                      |
|                  | 1321 s                                           | Aromatics                                                            |                                                                                      |
|                  | 1368 vs                                          | $\nu(\text{C}-\text{C})$ Aromatics                                   |                                                                                      |
|                  | 1484 m                                           | $\delta(\text{NH})$                                                  |                                                                                      |
| 1642 m           | $\nu(\text{C}-\text{C})$ Aromatics               |                                                                      |                                                                                      |

$\sigma$ : stretching vibration;  $\delta$ : bending vibration;  $\delta_s$ : symmetric bending vibration;  $\nu(\text{circle})$ : ring breathing;  $\delta(\text{circle})$ : inner surface deformation of the ring;  $\gamma(\text{CH})$ : outside surface deformation of CH;  $\gamma(\text{circle})$ : outer surface deformation;  $\rho$ —rocking, in plane bending;  $\gamma$ —wagging

Raman Intensity: vs: very strong; s: strong; m: medium; w: weak.

**Table S3** SERS intensity of VBB and VBB-*E. coli* molecular probe

| Raman shift<br>( $\text{cm}^{-1}$ ) | Intensity (VBB) | SERS intensity ratio of<br>the $I_{1611\text{cm}^{-1}}$ | Intensity (VBB-<br>sbacteria) | SERS intensity ratio of<br>the $I_{1611\text{cm}^{-1}}$ |
|-------------------------------------|-----------------|---------------------------------------------------------|-------------------------------|---------------------------------------------------------|
| 198                                 | 370             | 0.40                                                    | 429                           | 0.44                                                    |
| 432                                 | 349             | 0.38                                                    | 354                           | 0.36                                                    |
| 677                                 | 261             | 0.28                                                    | 376                           | 0.38                                                    |
| 793                                 | 316             | 0.34                                                    | 558                           | 0.57                                                    |
| 1165                                | 481             | 0.52                                                    | 876                           | 0.89                                                    |
| 1199                                | 454             | 0.49                                                    | 834                           | 0.85                                                    |
| 1364                                | 487             | 0.53                                                    | 800                           | 0.81                                                    |
| 1392                                | 652             | 0.71                                                    | 936                           | 0.95                                                    |
| 1611                                | 920             | 1.00                                                    | 983                           | 1.00                                                    |

Table S4 SERS intensity of dyes

| Dyes          | Max intensity ( $\text{cm}^{-1}$ ) | Dyes           | Max intensity ( $\text{cm}^{-1}$ ) |
|---------------|------------------------------------|----------------|------------------------------------|
| VBB           | 1084 (1611)                        | Crystal violet | 328 (796)                          |
| VB4R          | 989 (1611)                         | Orange II      | 40 (1390)                          |
| SafraninT     | 276 (1613)                         | Rhodamine B    | 60 (616)                           |
| Peafowl green | 68 (612)                           | Indigo blue    | 57 (1619)                          |
| Basic orange  | 50 (1379)                          | Acridine red   | 197 (1368)                         |

Table S5 SERS effect comparison of different silver nanoparticles

| Silver nanoparticles * | Sensitizer            | Probe | $I_{1611\text{cm}^{-1}}$ |
|------------------------|-----------------------|-------|--------------------------|
| Spherical              | NaCl, $\text{AgNO}_3$ | VBB   | 441                      |
| Triangle               | NaCl, $\text{AgNO}_3$ | VBB   | 756                      |
| AgNPs                  | NaCl, $\text{AgNO}_3$ | VBB   | 1149                     |
| AgNPs/0.001% GO        | NaCl, $\text{AgNO}_3$ | VBB   | 757                      |
| AgNPs/0.002% GO        | $\text{AgNO}_3$       | VBB   | 365                      |

The Ag concentration of nanoparticles was  $5\ \mu\text{g}/\text{mL}$ , NaCl:  $1.5 \times 10^{-3}\ \text{mol}/\text{L}$ ,  $\text{AgNO}_3$ :  $0.01\ \mu\text{g}/\text{mL}$ , VBB:  $1.0 \times 10^{-6}\ \text{mol}/\text{L}$



**Table S6** Effect of foreign substances in detecting progress ( $5.0 \times 10^8$  cfu/mL *E. coli*)

| Coexistent substance | Tolerance concentration  | Relative error (%) | Coexistent substance          | Tolerance concentration  | Relative error (%) |
|----------------------|--------------------------|--------------------|-------------------------------|--------------------------|--------------------|
| Ca <sup>2+</sup>     | 0.8 mmol/L               | 5.0                | Br <sup>-</sup>               | 0.8 mmol/L               | 4.0                |
| Zn <sup>2+</sup>     | 0.5 mmol/L               | 3.3                | F <sup>-</sup>                | 1.0 mmol/L               | 6.2                |
| Mg <sup>2+</sup>     | 0.6 mmol/L               | -4.0               | NO <sub>3</sub> <sup>-</sup>  | 0.4 mmol/L               | -5.0               |
| Ba <sup>2+</sup>     | 0.4 mmol/L               | -5.0               | ClO <sub>4</sub> <sup>-</sup> | 0.6 mmol/L               | 4.5                |
| Cu <sup>2+</sup>     | 0.3 mmol/L               | 4.6                | CO <sub>3</sub> <sup>2-</sup> | 0.5 mmol/L               | 5.6                |
| Co <sup>2+</sup>     | 0.7 mmol/L               | 3.0                | SO <sub>4</sub> <sup>2-</sup> | 0.8 mmol/L               | -2.8               |
| <i>B. subtilis</i>   | $5.0 \times 10^7$ cfu/mL | 9.0                | <i>S. aureus</i>              | $1.5 \times 10^9$ cfu/mL | 9.0                |

**Table S7** Analytical characteristic of detecting *B. subtilis*

| Methods | System                              | LR(cfu/mL)                          | Regress equation                  | R <sup>2</sup> | DL(cfu/mL)      |
|---------|-------------------------------------|-------------------------------------|-----------------------------------|----------------|-----------------|
| SERS    | AgNPs-NaCl-VBB- <i>B. subtilis</i>  | $3 \times 10^6$ - $2 \times 10^9$   | $\Delta I_{1611} = 206.5c + 18.5$ | 0.9982         | $1 \times 10^6$ |
|         | Unstained <i>B. subtilis</i>        | $5 \times 10^6$ - $6 \times 10^9$   | $\Delta I_{295} = 266.4c + 311.6$ | 0.9968         | $2 \times 10^6$ |
| RRS     | VBB- <i>B. subtilis</i>             | $6 \times 10^6$ - $5 \times 10^9$   | $\Delta I_{295} = 193.4c + 286.8$ | 0.9942         | $2 \times 10^6$ |
|         | AgNPs-NaCl- VBB- <i>B. subtilis</i> | $6 \times 10^6$ - $1.5 \times 10^9$ | $\Delta I_{340} = 550.6c + 107.8$ | 0.9879         | $2 \times 10^6$ |

**Table S8** Analytical characteristic of detecting *S. aureus*

| Methods | System                       | LR(cfu/mL)                               | Regress equation                 | R <sup>2</sup> | DL(cfu/mL)             |
|---------|------------------------------|------------------------------------------|----------------------------------|----------------|------------------------|
| SERS    | AgNPs-VBB- <i>S. aureus</i>  | $1 \times 10^3$ - $2 \times 10^6$ cfu/mL | $\Delta I_{1611} = 62.5c + 5.0$  | 0.9998         | $1 \times 10^3$ cfu/mL |
|         | Unstained <i>S. aureus</i>   | $3 \times 10^3$ - $3 \times 10^6$ cfu/mL | $\Delta I_{295} = 34.8c + 312.6$ | 0.9957         | $2 \times 10^3$ cfu/mL |
| RRS     | VBB- <i>S. aureus</i>        | $2 \times 10^3$ - $2 \times 10^6$ cfu/mL | $\Delta I_{295} = 54.2c + 117.4$ | 0.9975         | $2 \times 10^6$ cfu/mL |
|         | AgNPs- VBB- <i>S. aureus</i> | $3 \times 10^3$ - $4 \times 10^6$ cfu/mL | $\Delta I_{340} = 28.9c + 37.1$  | 0.9955         | $2 \times 10^6$ cfu/mL |

Table S9 Comparison of different analytical methods for the detection of bacteria

| Methods                       | Principle                                                                                                                                                                                                                                                                                                                                                                                                                                                      | Liner range<br>cfu/mL              | DL                        | Comment                                  | Refs        |
|-------------------------------|----------------------------------------------------------------------------------------------------------------------------------------------------------------------------------------------------------------------------------------------------------------------------------------------------------------------------------------------------------------------------------------------------------------------------------------------------------------|------------------------------------|---------------------------|------------------------------------------|-------------|
| PCR                           | Utilized multiplex PCR                                                                                                                                                                                                                                                                                                                                                                                                                                         |                                    | $2 \times 10^4$<br>cfu/mL | Classic, but long process                | 24          |
| ELISA                         | An indirect ELISA method was used to detect the presence of pathogenic bacteria in vegetables                                                                                                                                                                                                                                                                                                                                                                  |                                    | $10^3$<br>cfu/g           | Good selectivity, but complex procedure  | 25          |
| Nucleic acid aptamer analysis | Obtained a panel of ssDNA aptamers specific against <i>S. aureus</i> by the subtractive SELEX, and demonstrated a superior effect of the combined use of these aptamers compared to an individual aptamer in the recognition of different strains of <i>S. aureus</i> or cells in different growth states.                                                                                                                                                     |                                    |                           | Good selectivity, but complex procedure. | 26          |
| Voltammetry                   | Aureus aptamer was immobilized on streptavidin coated magnetic beads (MB), which serves as a capture probe. A secondary anti- <i>S. aureus</i> aptamer was conjugated to silver nanoparticles that sensitively reports the detection of the target. In the presence of target bacterium, an Apt/ <i>S.aureus</i> /apt-AgNP sandwich complex is formed on the MB surface and the electrochemical signal of AgNPs followed through anodic stripping voltammetry. | 10 -<br>$1 \times 10^6$<br>cfu/mL  | 1<br>cfu/mL               | Sensitivity, but complex procedure.      | 27          |
| Biosensor                     | Rapid detection and quantification of <i>E. coli</i> O157:H7 in meat and water samples based on the electrocatalytic properties of AuNP towards hydrogen evolution reaction and superparamagnetic microbeads as pre-concentration/purification platforms without the need of broth enrichment is developed for the first time.                                                                                                                                 | 100 -<br>$1 \times 10^5$<br>cfu/mL | 309<br>cfu/mL             | Sensitivity, but complex principle.      | 28          |
| VBB-bacteria SERS             | In the AgNPs substrate, VBB-bacteria have a strong SERS peak at $1611 \text{ cm}^{-1}$ . The SERS signal is increased with the increased concentration of VBB-bacteria in a certain range.                                                                                                                                                                                                                                                                     | 10-700<br>cfu/mL                   | 10<br>cfu/mL              | Sensitive, simple, and rapid.            | This method |

Table S10 VBB-bacteria SERS intensity of different culture time

| <i>T</i> | <i>c(E.coli)</i> |     |     |     |     |     |      |  |
|----------|------------------|-----|-----|-----|-----|-----|------|--|
|          | 0                | 10  | 50  | 100 | 300 | 500 | 700  |  |
| 6h       | -                | -   | -   | -   | -   | -   | -    |  |
| 9h       | -                | -   | -   | -   | -   | -   | 199  |  |
| 12h      | -                | 107 | 244 | 323 | 644 | 982 | 1123 |  |
